# Supplementary material
Source: Springer Nature journal article supplement (https://www.springermedizin.de/resource/supplementary/12884_2013_825_MOESM2_ESM.pdf/9458284)
Supplement: MOESM2 [file 9458284]

Pregnancies included in *Count With Mestudy* (n=1445)

Non-DFM pregnancies not included in the current report, n=1238\*

Pregnancies with DFM from week 24 (n=207)

DFM events (number of consultations; n=228)

DFM events excluded from analysis due to missing data (n= 78)

DFM events included in analysis (n=148)\*\*

Number of pregnancies (n=70)

Number of pregnancies (n=137)
